# Supplementary material
Source: MDPI journal article supplement (https://www.mdpi.com/2072-4292/14/22/5900)
Supplement: s1 [file s1]

## Supplementary Information

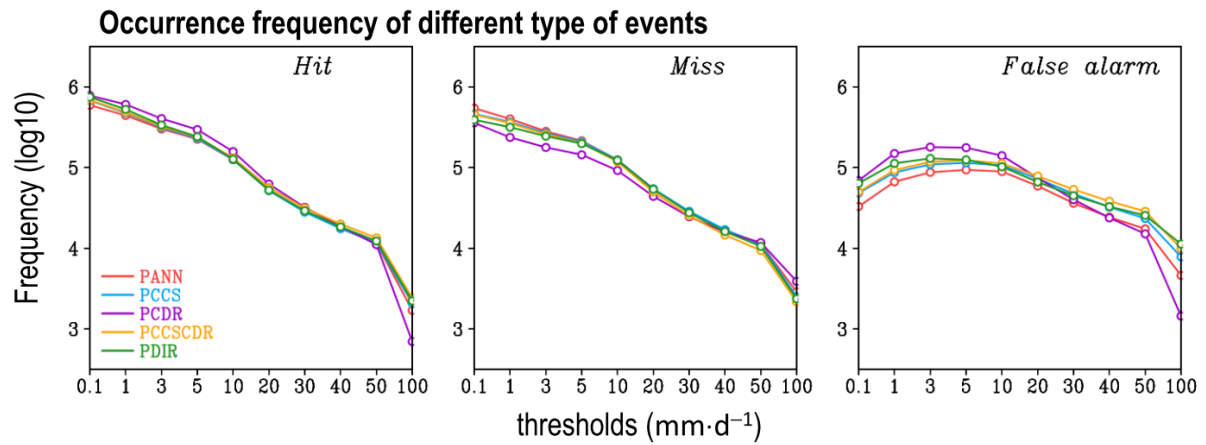

**Figure S1** Statistical scores calculated for the comparison between APHRO and five SPPs from 2003–2015 at different precipitation thresholds. From left to right presents the frequency of hit, miss, and false alarm events, respectively.
